# Supplementary material
Source: Springer Nature journal article supplement (https://www.springermedizin.de/resource/supplementary/12958_2009_601_MOESM3_ESM.pdf/9568068)
Supplement: MOESM3 [file 9568068]

ovgpl\_bos 46 RFTTMLSTFSNRERFVSSVIALLRTHGFDGLDLFFLYPGLRGSPPARDRW  
RFTT+LS +N E F+ SV +LLRTH F GLDLFFLYPGLRGS P D W  
RFTTTLVSASANWEVFIDSVASLLRTHDFGGLDLFFLYPGLRGSPPMDWW

7883595-7903595 4886 ataagctgtgatgtagtggtccaacgtggcgcttttcgcagacacggt  
gtccttccccagatttactccttgcaatggtattttacgtgggctaagg  
gcctggtatccgggttcataaccggatcctcgcgcccgctaaaccgcg

ovgpl\_bos 95 TFVFLLE ELLQAFKNEAQLTMRPRL  
TF+FL+E E A+LT+RPRL  
TFLFLIE E-----ARLTIRPRL

7883595-7903595 5033 atcttagGTAAGGC Intron 1 AAGg gccaacacc  
cttttta<0-----[5054 : 5620]-0>a cgctctgctt  
ttccata g agccctaggg

ovgpl\_bos 121 LSAAVSGDPHVQKAYEARLLG L  
LSAAVSGDP +VQ AY+A LG L  
LSAAVSGDPDIVQTAYDACCLG R:R[aga] L

7883595-7903595 5654 ctgggtggcgagcagtggttcgAGGTGAGTG Intron 2 CAGAC  
tcctcgcacattaccaacggtg <2-----[5722 : 6989]-2> t  
ctttctgcaccaatttgctaa c

ovgpl\_bos 145 LDFISVLSYDLHGSWEKVTGHNSPLFSLPGDPKSS  
LDFISVLS DLHGSWEK+ HNSPLFSLPGD KS  
LDFISVLSCDLHGSWEKI HNSPLFSLPGDSKSL

7883595-7903595 6994 cgtaagtttgctgatgaal caacctccggatt  
tattgttcgatagggat aagcttctcgacact  
gtcctcgcttcatacgagc tcccgtgtaccatg

ovgpl\_bos 180 AYAMNYWRQLGVPPEKLLMGLPTYGR  
AYAMN WR+LG PPEKLLMGLPTYGR  
AYAMNSWRKLGAPPEKLLMGLPTYGR

7883595-7903595 7094 GTAAGAA Intron 3 CAGgtgaattcacggccgaccagccatgc  
<0-----[7094 : 7194]-0>cactacggatgccccatttgctccagg  
atcgtcgagtgcacggccgacctat

ovgpl\_bos 206 TFHLLKASQNELRAQAVGPASPGKYTKQAGFLAYYE  
F LL+AS+ L+A+AV PA PGKY KQAGFLAYYE  
PFRLLRASKTGLQAEAVEPAFPGKYIKQAGFLAYYE

7883595-7903595 7273 ctcccagtaagccggggcgctcgataacggttgttg  
ctggtgccacgtacactacctcgaataacggttcaa  
ctcccacagtggcatgacataggccgatccggttg

ovgpl\_bos 242 ICCFVRAKKRWINDQYVPYAFKKE  
IC FV++ KRWI+ QY+PYA+KGKE  
ICYFVQKVKRWIDYQYIPYAYKKE

7883595-7903595 7381 GTGACAG Intron 4 CAGatttgcagaactagtctactgtagag  
<0-----[7381 : 8980]-0>tgattaataaggtaaaatcacaagaa  
tcctcgagggcgctttgtcatccgggg

ovgpl\_bos 268 WVGYYDDAISFGYK AFFIKREHFGGAM  
WVGYYDDAISF YK A+FIKREHFGGAM  
WVGYYDDAISFSYK ALFIKREHFGGAM

7883595-7903595 9059 tgggtgggaatataGTAAGAC Intron 5 CAGgttaagctggga  
gtgaaactgtgaa<0-----[9098 : 12396]-0>ctttagaatggct  
gtctttcccctca agcagaattgtcg

ovgpl\_bos 294 VWTLDLDDFRGYFCGTGPFPLVHTLNNLLVND  
VWTLDLDD RG F G GPF LV+ LN+LLV  
VWTLDLDDVRGBTFYGVGPFRLVYVLNHLVQA

7883595-790359512436 gtacgcgggagatgggctccgtgtaccgcg  
tgctataatggctagtgtctgttattaatttac  
ggagcgttcgctcttgctcctctggttcgagt

ovgpl\_bos 326 FSSTPSPKFWFSTAVNSSRIGPE  
FSSTPSPKFW+S+A+NSS E  
E:E[gag] FSSTPSPKFWLSSAMNSSGTDSE

7883595-790359512532 GGTAAGTA Intron 6 TAGAGtatactcattcttgattgagt  
<1-----[12533:13509]-1> tgcccccatgtccctaccgcaca  
cattaatgcatgtgtaacctaa

ovgpl\_bos 350 MPTMTRDLTTGLGILPPGGEAVATETHRKSETMTITPKGEIATPRTPL  
T+T+ LTT LGIL P EA+ATETHRKSE MT P+G TP R +  
RLTVTKALTTDLGILSPREEMATETHRKSENMTIPRGGTVTPIRETM

7883595-790359513581 acagaagtaagtgattcagggagagacaatgaaaaacaggagacaagaa  
gtctcactccatgttccgaactccacagacaatcctcgggctcctgact  
gggtgcgagcttggtgcagagtgtctgtagtatgcaccatgtgctagatg

ovgpl\_bos 399 SFGRRATA-----PEGKT -ESPGEKP  
SFG+ T A P G + +PG  
SFGKSTVALEDHDFCGPS TVTPGGMT

7883595-790359513728 ttgaaagggcggcgtgctGTCTGTG Intron 7 TAGagacggaa  
ctgagctctaaaacggcc<0-----[13782:13827]-0>ctccggtc  
ctagctataactcctgaa tgctaagt

ovgpl\_bos 419 LTTVGH LAVSPGGI AVGPVRLQT---GQKVTPPGRKAGVPEKVTTPSGK  
LT VGH +V+P + P+ LQT G+K+ P RK EK+T PSBK  
LTPVGHQSVTPAKMTITPMHLQTTETPGEKIIPLRKTVATEKMTIPSGK

7883595-790359513852 tacggcctgacgaaaaaacaccagacggaaacaaaaggagaaaactga  
tcctgaactcccctctctatacaccgaattctggactccaatctccga  
gctgtgtgctaggtctgttatgcttaggcactaggtactaggtcctag

ovgpl\_bos 465 MTVTPDGR  
MTVTP GR  
MTVTPMGR

7883595-790359513999 aagacaga  
tctcctgg  
gaccagca
